# Supplementary material for: Baseline Levels of Influenza-Specific B Cells and T Cell Responses Modulate Human Immune Responses to Swine Variant Influenza A/H3N2 Vaccine
Source: PubMed Central journal article supplement (PMC7157591; doi:10.3390/vaccines8010126), 2020-03-13

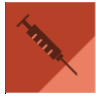

Article

# Baseline Levels of Influenza-Specific B Cells and T Cell Responses Modulate Human Immune Responses to Swine Variant Influenza A/H3N2 Vaccine

Table S1. Summary of HAI antibody titer and seroconversion.

| Subject | Day 0 (Vac 1) |        | Day 8             |                 |        | Day 21 (Vac 2)    |                 |        | Day 28            |                 |        | Day 42            |                 |  |
|---------|---------------|--------|-------------------|-----------------|--------|-------------------|-----------------|--------|-------------------|-----------------|--------|-------------------|-----------------|--|
|         | Titer         | Titer  | Ratio to Baseline | SC <sup>1</sup> | Titer  | Ratio to Baseline | SC <sup>1</sup> | Titer  | Ratio to Baseline | SC <sup>1</sup> | Titer  | Ratio to Baseline | SC <sup>1</sup> |  |
| ID01    | 113.14        | 80     | 0.7               | N               | 80     | 0.7               | N               | 160    | 1.4               | N               | 160    | 1.4               | N               |  |
| ID02    | 56.57         | 80     | 1.4               | N               | 160    | 2.8               | N               | 160    | 2.8               | N               | 160    | 2.8               | N               |  |
| ID03    | 10            | 20     | 2                 | N               | 28.28  | 2.8               | N               | 20     | 2                 | N               | 20     | 2                 | N               |  |
| ID04    | 40            | 80     | 2                 | N               | 56.57  | 1.4               | N               | 160    | 4                 | Y               | 80     | 2                 | N               |  |
| ID05    | 40            | 160    | 4                 | Y               | 160    | 4                 | Y               | 160    | 4                 | Y               | 160    | 4                 | Y               |  |
| ID06    | 20            | 80     | 4                 | Y               | 160    | 8                 | Y               | 160    | 8                 | Y               | 320    | 16                | Y               |  |
| ID07    | 28.28         | 28.28  | 1                 | N               | 40     | 1.4               | N               | 20     | 0.7               | N               | 20     | 0.7               | N               |  |
| ID08    | 10            | 226.27 | 22.6              | Y               | 320    | 32                | Y               | 320    | 32                | Y               | 160    | 16                | Y               |  |
| ID09    | 20            | 80     | 4                 | Y               | 452.55 | 22.6              | Y               | 640    | 32                | Y               | 640    | 32                | Y               |  |
| ID10    | 10            | 20     | 2                 | N               | 20     | 2                 | N               | 20     | 2                 | N               | 20     | 2                 | N               |  |
| ID11    | 20            | 640    | 32                | Y               | 320    | 16                | Y               | 452.55 | 22.6              | Y               | 452.55 | 22.6              | Y               |  |
| ID12    | 113.14        | 452.55 | 4                 | Y               | 160    | 1.4               | N               | 160    | 1.4               | N               | 320    | 2.8               | N               |  |
| ID13    | 5             | 10     | 2                 | N               | 20     | 4                 | N               | 20     | 4                 | N               | 20     | 4                 | N               |  |
| ID14    | 40            | 80     | 2                 | N               | 80     | 2                 | N               | 80     | 2                 | N               | 80     | 2                 | N               |  |
| ID15    | 10            | 80     | 8                 | Y               | 113.14 | 11.3              | Y               | 80     | 8                 | Y               | 160    | 16                | Y               |  |
| ID16    | 56.57         | 80     | 1.4               | N               | 80     | 1.4               | N               | 80     | 1.4               | N               | 80     | 1.4               | N               |  |
| ID17    | 20            | 160    | 8                 | Y               | 320    | 16                | Y               | 320    | 16                | Y               | 320    | 16                | Y               |  |
| ID18    | 113.14        | 226.27 | 2                 | N               | 226.27 | 2                 | N               | 320    | 2.8               | N               | 320    | 2.8               | N               |  |
| ID19    | 40            | 160    | 4                 | Y               | 160    | 4                 | Y               | 226.27 | 5.7               | Y               | 320    | 8                 | Y               |  |
| ID20    | 20            | 20     | 1                 | N               | 40     | 2                 | N               | 40     | 2                 | N               | 40     | 2                 | N               |  |
| ID21    | 28.28         | 640    | 22.6              | Y               | 640    | 22.6              | Y               | 640    | 22.6              | Y               | 452.55 | 16                | Y               |  |
| ID22    | 28.28         | 160    | 5.7               | Y               | 160    | 5.7               | Y               | 160    | 5.7               | Y               | 160    | 5.7               | Y               |  |
| ID23    | 20            | 80     | 4                 | Y               | 80     | 4                 | Y               | 80     | 4                 | Y               | 80     | 4                 | Y               |  |
| ID24    | 40            | 160    | 4                 | Y               | 320    | 8                 | Y               | 320    | 8                 | Y               | 640    | 16                | Y               |  |
| ID25    | 28.28         | 40     | 1.4               | N               | 113.14 | 4                 | Y               | 113.14 | 4                 | Y               | 160    | 5.7               | Y               |  |

<sup>1</sup> SC = Seroconversion

**Table S2.** Summary of neutralization antibody titer and seroconversion.

| Subject | Day 0 (Vac 1) |       | Day 8             |                 | Day 21 (Vac 2) |                   |                 | Day 28 |                   |                 | Day 42 |                   |                 |
|---------|---------------|-------|-------------------|-----------------|----------------|-------------------|-----------------|--------|-------------------|-----------------|--------|-------------------|-----------------|
|         | Titer         | Titer | Ratio to Baseline | SC <sup>1</sup> | Titer          | Ratio to Baseline | SC <sup>1</sup> | Titer  | Ratio to Baseline | SC <sup>1</sup> | Titer  | Ratio to Baseline | SC <sup>1</sup> |
| ID01    | 254           | 317   | 1.2               | N               | 334            | 1.3               | N               | 304    | 1.2               | N               | 405    | 1.6               | N               |
| ID02    | 165           | 210   | 1.3               | N               | 412            | 2.5               | N               | 501    | 3                 | N               | 644    | 3.9               | N               |
| ID03    | 20            | 54    | 2.7               | N               | 54             | 2.7               | N               | 47     | 2.4               | N               | 45     | 2.3               | N               |
| ID04    | 148           | 175   | 1.2               | N               | 159            | 1.1               | N               | 309    | 2.1               | N               | 154    | 1                 | N               |
| ID05    | 5             | 337   | 67.4              | Y               | 632            | 126.4             | Y               | 548    | 109.6             | Y               | 372    | 74.4              | Y               |
| ID06    | 5             | 267   | 53.4              | Y               | 708            | 141.6             | Y               | 677    | 135.4             | Y               | 748    | 149.6             | Y               |
| ID07    | 5             | 21    | 4.2               | N               | 35             | 7                 | N               | 32     | 6.4               | N               | 20     | 4                 | N               |
| ID08    | 10            | 735   | 73.5              | Y               | 655            | 65.5              | Y               | 594    | 59.4              | Y               | 319    | 31.9              | Y               |
| ID09    | 5             | 79    | 15.8              | Y               | 696            | 139.2             | Y               | 671    | 134.2             | Y               | 670    | 134               | Y               |
| ID10    | 27            | 39    | 1.4               | N               | 75             | 2.8               | N               | 75     | 2.8               | N               | 82     | 3                 | N               |
| ID11    | 26            | 699   | 26.9              | Y               | 685            | 26.3              | Y               | 801    | 30.8              | Y               | 658    | 25.3              | Y               |
| ID12    | 5             | 5     | 1                 | N               | 5              | 1                 | N               | 5      | 1                 | N               | 5      | 1                 | N               |
| ID13    | 11            | 42    | 3.8               | N               | 232            | 21.1              | Y               | 179    | 16.3              | Y               | 234    | 21.3              | Y               |
| ID14    | 79            | 135   | 1.7               | N               | 208            | 2.6               | N               | 214    | 2.7               | N               | 281    | 3.6               | N               |
| ID15    | 14            | 156   | 11.1              | Y               | 284            | 20.3              | Y               | 156    | 11.1              | Y               | 314    | 22.4              | Y               |
| ID16    | 102           | 278   | 2.7               | N               | 188            | 1.8               | N               | 238    | 2.3               | N               | 161    | 1.6               | N               |
| ID17    | 67            | 655   | 9.8               | Y               | 1797           | 26.8              | Y               | 1551   | 23.1              | Y               | 957    | 14.3              | Y               |
| ID18    | 315           | 567   | 1.8               | N               | 659            | 2.1               | N               | 653    | 2.1               | N               | 658    | 2.1               | N               |
| ID19    | 242           | 654   | 2.7               | N               | 686            | 2.8               | N               | 659    | 2.7               | N               | 680    | 2.8               | N               |
| ID20    | 37            | 51    | 1.4               | N               | 67             | 1.8               | N               | 61     | 1.6               | N               | 74     | 2                 | N               |
| ID21    | 5             | 1227  | 245.4             | Y               | 3693           | 738.6             | Y               | 3448   | 689.6             | Y               | 1559   | 311.8             | Y               |
| ID22    | 13            | 565   | 43.5              | Y               | 541            | 41.6              | Y               | 440    | 33.8              | Y               | 292    | 22.5              | Y               |
| ID23    | 33            | 192   | 5.8               | Y               | 229            | 6.9               | Y               | 232    | 7                 | Y               | 213    | 6.5               | Y               |
| ID24    | 75            | 433   | 5.8               | Y               | 823            | 11                | Y               | 705    | 9.4               | Y               | 1206   | 16.1              | Y               |
| ID25    | 22            | 111   | 5                 | Y               | 215            | 9.8               | Y               | 254    | 11.5              | Y               | 281    | 12.8              | Y               |

<sup>1</sup> SC = Seroconversion

**Table S3.** HAI and MN response by demographic and baseline characteristics of participants.

| Characteristics                      | HAI Response at Day 42 |                       |                             | MN Response at Day 42   |                             |
|--------------------------------------|------------------------|-----------------------|-----------------------------|-------------------------|-----------------------------|
|                                      | N                      | GMT (95% CI)          | Seroconversion - % (95% CI) | GMT (95% CI)            | Seroconversion - % (95% CI) |
| <b>Age</b>                           |                        |                       |                             |                         |                             |
| 18 – 49 (N=X)                        | 19                     | 121.70 (72.93-203.09) | 47.4 (24.4-71.1)            | 268.22 (157.44-456.93)  | 42.1 (20.3-66.5)            |
| 50+ (N=X)                            | 6                      | 190.27 (52.06-695.48) | 66.7 (22.3-95.7)            | 229.21 (28.39-1850.35)  | 83.3 (35.9-99.6)            |
| <b>Gender</b>                        |                        |                       |                             |                         |                             |
| Female                               | 11                     | 128.33 (60.45-272.45) | 63.6 (30.8-89.1)            | 285.47 (140.25-581.05)  | 63.6 (30.8-89.1)            |
| Male                                 | 14                     | 141.37 (74.15-269.55) | 42.9 (17.7-71.1)            | 238.76 (98.58-578.30)   | 42.9 (17.7-71.1)            |
| <b>Race</b>                          |                        |                       |                             |                         |                             |
| Asian                                | 4                      | 160.00 (44.77-571.78) | 50.0 (6.8-93.2)             | 414.29 (154.26-1112.65) | 50.0 (6.8-93.2)             |
| Black                                | 8                      | 174.48 (67.37-451.86) | 50.0 (15.7-84.3)            | 331.89 (113.31-972.14)  | 37.5 (8.5-75.5)             |
| Multi-Racial                         | 1                      | 160.00 (NC)           | 100.0 (2.5-100.0)           | 281.00 (NC)             | 100.0 (2.5-100.0)           |
| White                                | 12                     | 106.79 (49.00-232.72) | 50.0 (21.1-78.9)            | 185.38 (69.20-496.61)   | 58.3 (27.7-84.8)            |
| <b>Prior IIV<sup>1</sup> Receipt</b> |                        |                       |                             |                         |                             |
| None                                 | 5                      | 171.48 (35.91-818.89) | 60.0 (14.7-94.7)            | 437.74 (109.60-1748.34) | 40.0 (5.3-85.3)             |
| 2011/12 or 2012/13 IIV               | 20                     | 127.73 (77.04-211.75) | 50.0 (27.2-72.8)            | 226.37 (119.73-428.00)  | 55.0 (31.5-76.9)            |

<sup>1</sup> IIV: Inactivated Influenza Vaccine; NC = Not calculated due to insufficient data

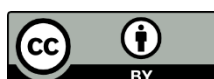

Supplement: vaccines-08-00126-s001.pdf [file vaccines-08-00126-s001.pdf]
